# Supplementary material for: Pandoraviruses are highly derived phycodnaviruses
Source: Springer Nature journal article supplement (doi:10.1186/1745-6150-8-25), 2013-10-23

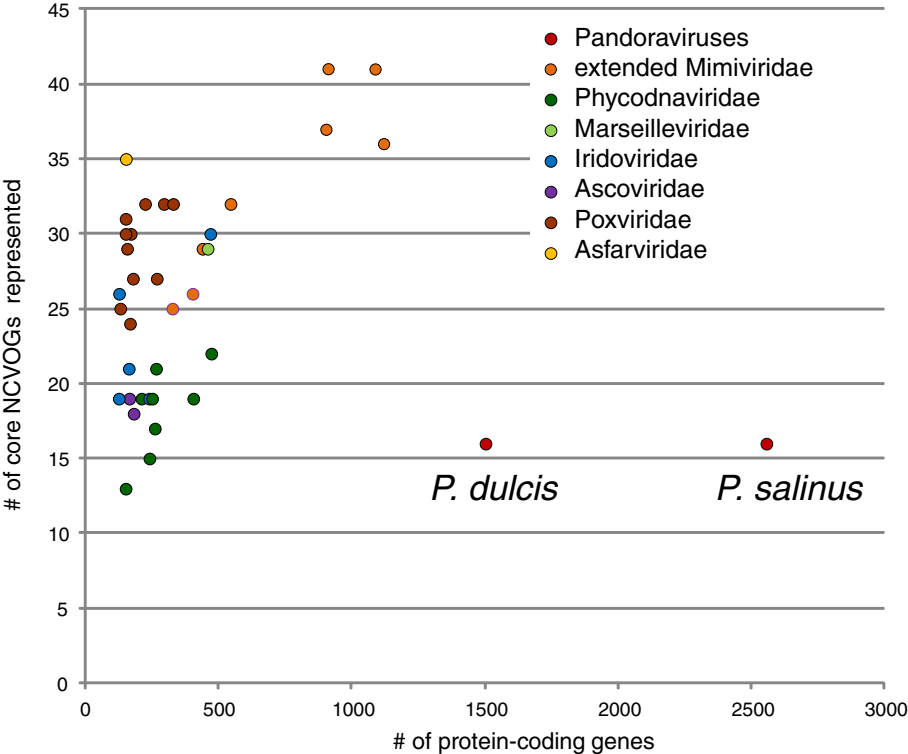

Supplement: 13062_2013_388_MOESM3_ESM.pdf [file 13062_2013_388_MOESM3_ESM.pdf]
