# Supplementary material for: Pandoraviruses are highly derived phycodnaviruses
Source: Springer Nature journal article supplement (doi:10.1186/1745-6150-8-25), 2013-10-23

A

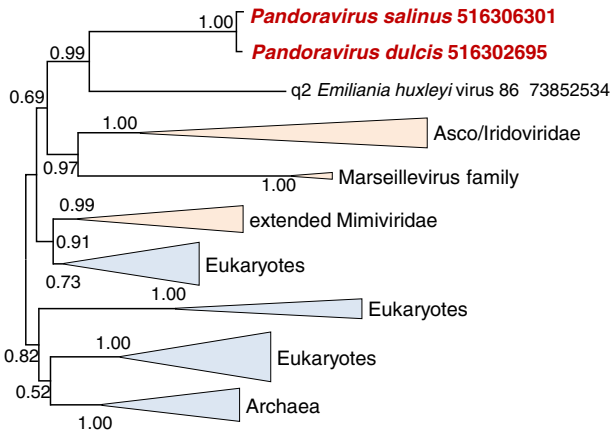

B

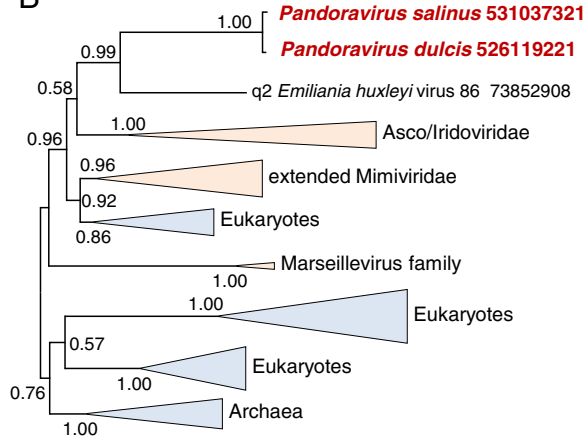

Supplement: 13062_2013_388_MOESM5_ESM.pdf [file 13062_2013_388_MOESM5_ESM.pdf]
